# Supplementary material for: SNAP-25b-deficiency increases insulin secretion and changes spatiotemporal profile of Ca2+oscillations in β cell networks
Source: PubMed Central journal article supplement (PMC5552776; doi:10.1038/s41598-017-08082-y), 2017-08-10
Supplement: 41598_2017_8082_MOESM1_ESM.pdf [file 41598_2017_8082_MOESM1_ESM.pdf]

## Supplementary information

### SNAP-25b-deficiency increases insulin secretion and changes spatiotemporal profile of $\text{Ca}^{2+}$ oscillations in $\beta$ cell networks

Teresa Daraio<sup>1</sup>, Lidija Križančić Bombek<sup>2</sup>, Marko Gosak<sup>2,3</sup>, Ismael Valladolid-Acebes<sup>1</sup>, Maša Skelin Klemen<sup>2</sup>, Essam Refai<sup>1</sup>, Per-Olof Berggren<sup>1</sup>, Kerstin Brismar<sup>1</sup>, Marjan Slak Rupnik<sup>2,4,\*</sup>, Christina Bark<sup>1,\*</sup>.

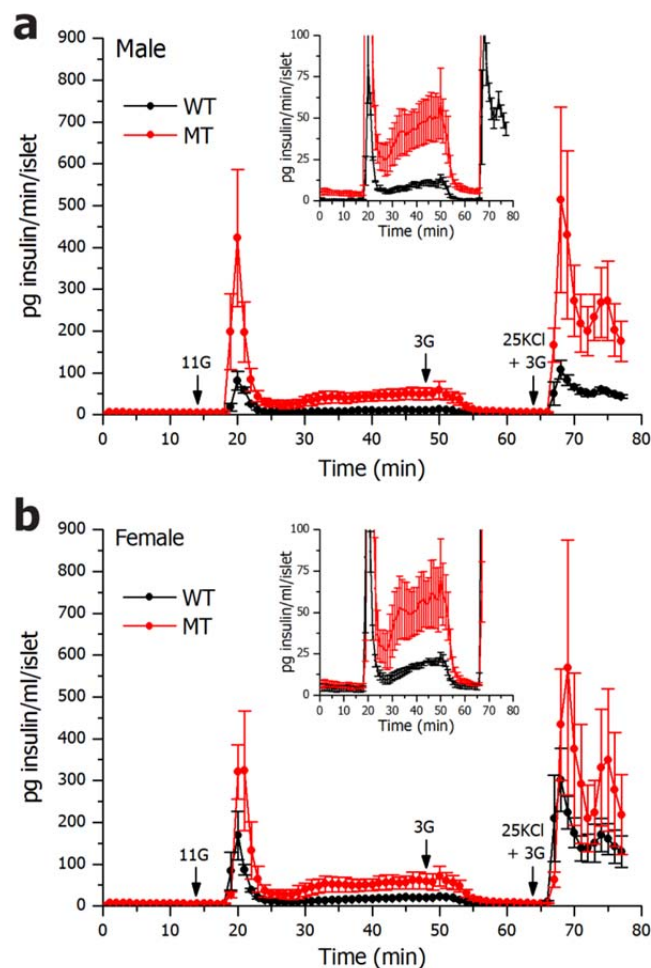

**Supplementary Figure 1: Islets isolated from SNAP-25b-deficient mice secrete more insulin in response to glucose.** Glucose-induced insulin release was measured in isolated pancreatic islets from 12 week old male (A) and female (B) mice. Insets represent magnifications of the second phase of insulin secretion.  $n=3-4$  animals per group. Data are represented as mean  $\pm$  SEM. WT mice, black lines; MT mice red lines.

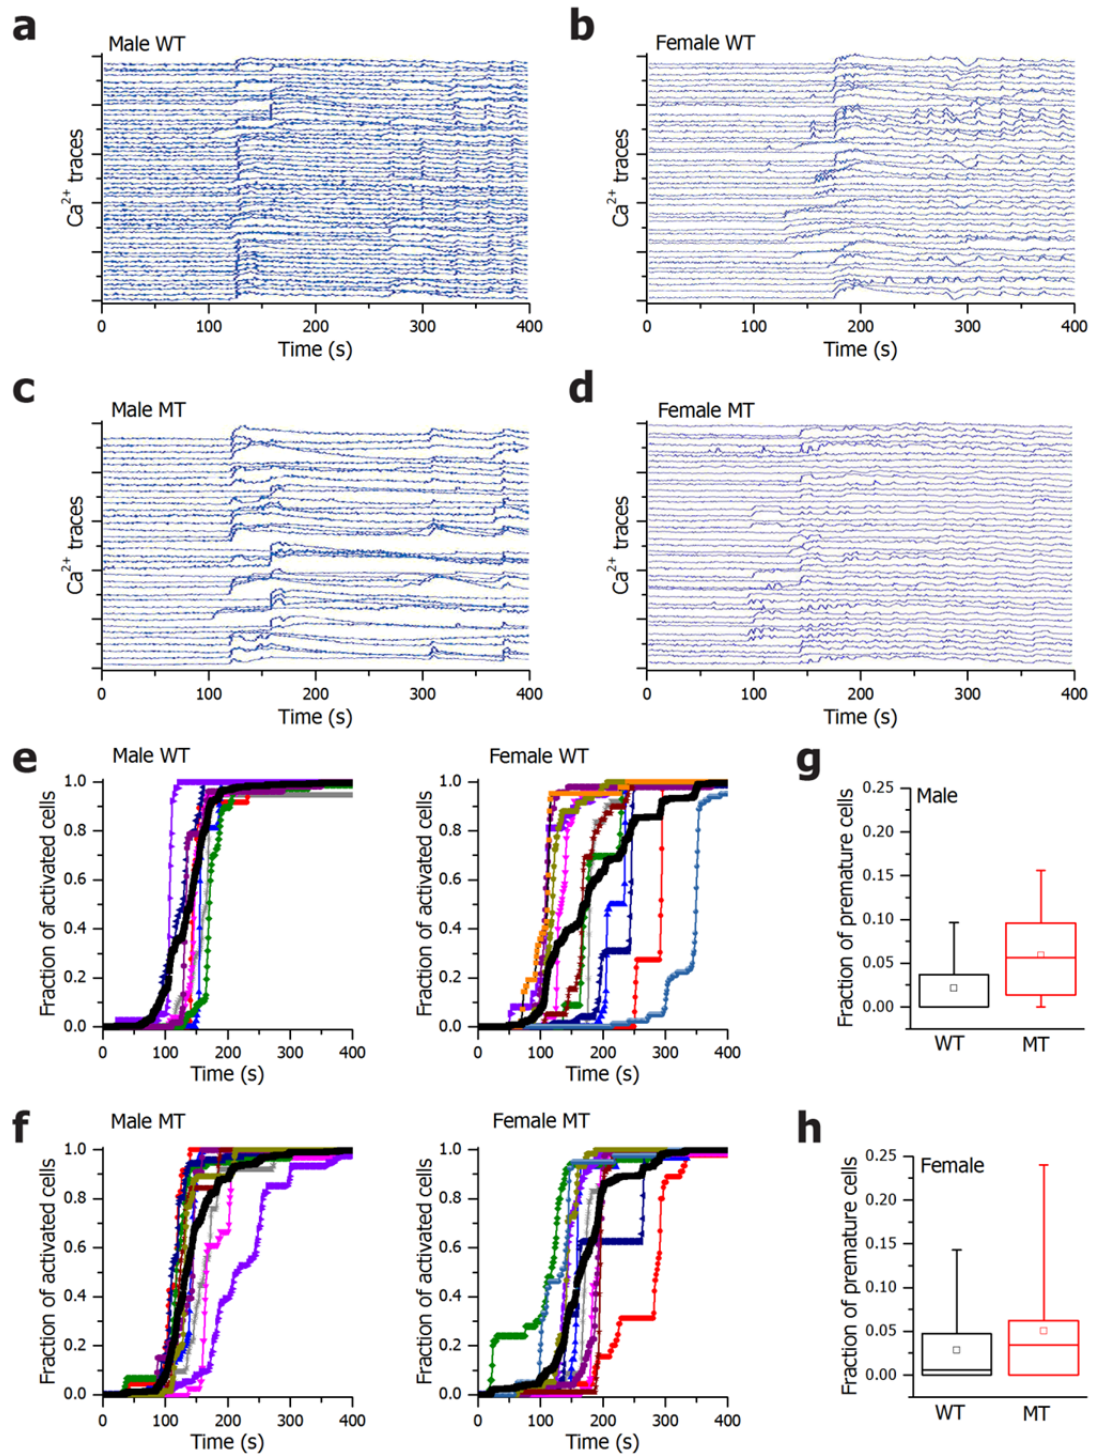

**Supplementary Figure 2: Glucose-stimulated activation of  $\beta$  cells.** Recorded  $[Ca^{2+}]_i$  traces in the phase of activation of  $\beta$  cells in a typical 12 week old WT and MT male (A and C) and WT and MT female (B and D). At time 0 the glucose concentration changed from 6 to 12 mM. Cumulative activation of  $\beta$  cells in individual slices after the rise in glucose concentration in given sub-groups (E and F). Colored lines with small symbols denote individual slices and the thick black line signifies the mean response in a given sub-group (E and F). Fraction of premature cells activated before the 70% of the mean activation value within a given islet (G and H). WT males,  $n=4$ , 8 islets, MT males,  $n=4$ , 10 islets, WT females,  $n=3$ , 12 islets, MT females,  $n=5$ , 11 islets. The box charts are defined in the same way as in Figure 3. WT mice, black bars; MT mice red bars.

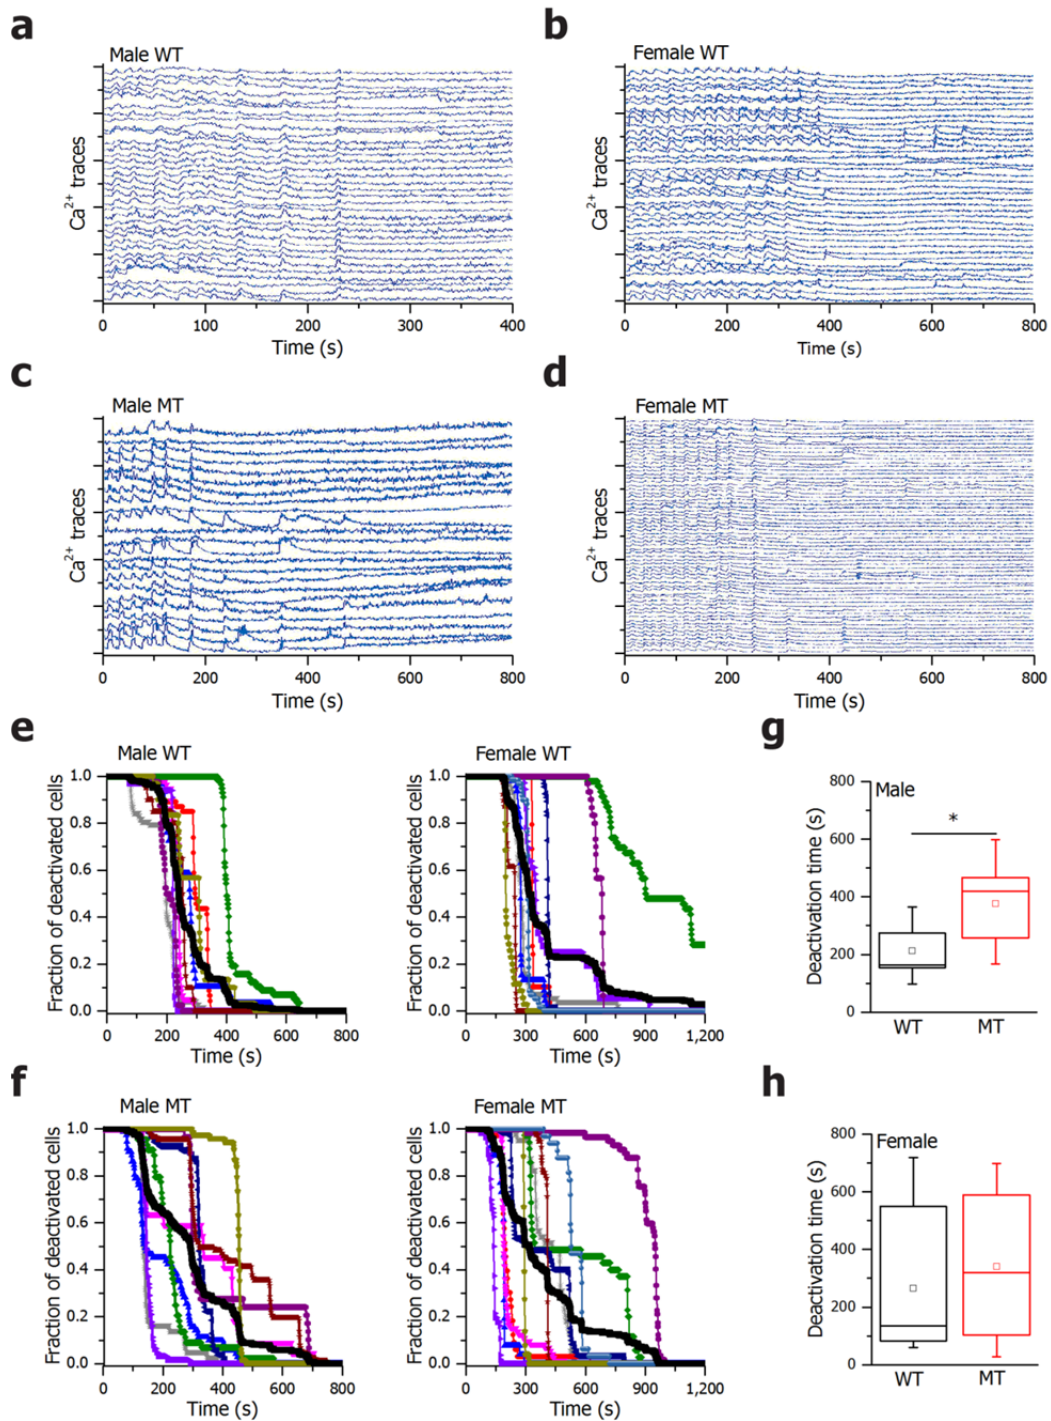

**Supplementary Figure 3: Deactivation of  $\beta$  cells.** Recorded  $[Ca^{2+}]_i$  traces in a typical 12 week old WT and MT male (A and C) and WT and MT female (B and D) after lowering the glucose concentration. At time 0 the glucose concentration changed from 12 mM to 6 mM. Cumulative deactivation in  $\beta$  cells, in individual slices, from the end of stimulation in all given sub-groups (E and F). Colored lines with small symbols denote individual slices and the thick black line signifies the mean response in a given sub-group. Comparison of deactivation times between WTs and MTs, defined as the time between the first and the last cell become inactive (G and H). WT males,  $n=4$ , 8 islets, MT males,  $n=4$ , 9 islets, WT females,  $n=3$ , 11 islets, MT females,  $n=5$ , 11 islets. The box charts are defined in the same way as in Figure 3. WT mice, black bars; MT mice red bars. \* $P < 0.05$ .

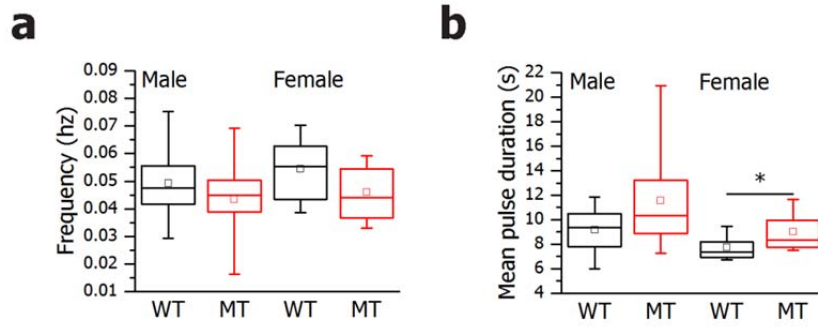

**Supplementary Figure 4: Intracellular characteristics of  $\text{Ca}^{2+}$  signaling in  $\beta$  cells.** The islet mean frequency of  $\text{Ca}^{2+}$ -oscillations in 12 week old males and females (A) and the islet mean durations of individual  $\text{Ca}^{2+}$ -oscillations for males and females (B). The intracellular oscillations exhibit a high level of inter-islet-variability with periods of oscillations ranging from  $1 \text{ min}^{-1}$  to  $4.7 \text{ min}^{-1}$  and individual oscillation durations spanning from 6 to 21 sec. WT males,  $n=4$ , 8 islets, MT males,  $n=4$ , 9 islets, WT females,  $n=3$ , 11 islets, MT females,  $n=5$ , 11 islets. The box charts are defined in the same way as in Figure 3. WT mice, black bars; MT mice red bars. \* $P<0.05$ .

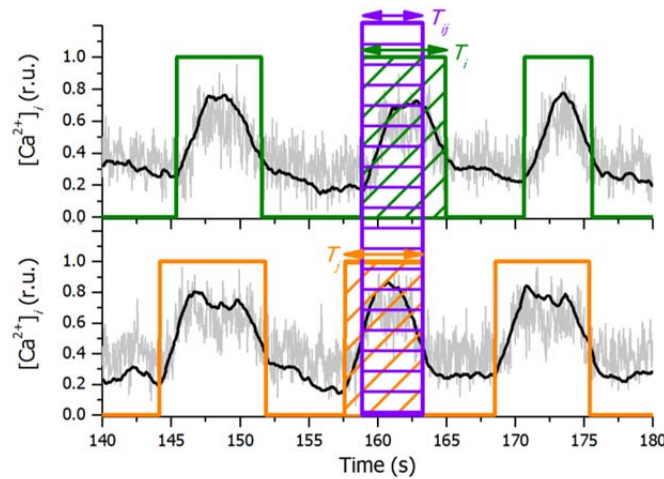

**Supplementary Figure 5: Quantification of the measured  $\text{Ca}^{2+}$  signals.** The grey lines represent the recorded  $\text{Ca}^{2+}$  traces of two active  $\beta$  cells (upper trace cell 1, lower trace cell 2). Recordings were band-pass filtered to remove noise, baseline trends and artefacts, and then smoothed with an adjacency averaging procedure. The obtained traces (black line) were then accordingly binarized. The cells with a low signal-to-noise ratio in which a firm binarization of the signal was not possible, were excluded from further analyses. The binarized activity profiles were used for the calculation of the frequencies and durations of  $\text{Ca}^{2+}$ -oscillations, and the level of synchronization among  $\beta$  cells by means of the coactivity coefficient, that measures the overlap of activity ( $T_{ij}$ , violet area) of  $i$ -th ( $T_i$ , green area) and  $j$ -th ( $T_j$ , orange area). Accordingly, the coactivity coefficient between the pair of  $\text{Ca}^{2+}$  traces is defined as

$$C_{ij} = \frac{T_{ij}}{\sqrt{T_i T_j}}$$

**Supplementary Video 1:** Animation of binarized spatiotemporal  $\text{Ca}^{2+}$ -activity during 12 mM glucose stimulation in a typical WT male sample.

**Supplementary Video 2:** Animation of binarized spatiotemporal  $\text{Ca}^{2+}$ -activity during 12 mM glucose stimulation in a typical MT male sample.
